# Supplementary material
Source: HighWire-hosted journal article supplement (https://erj.ersjournals.com/content/52/1/1702611)
Supplement: inline-supplementary-material-1 [file inline-supplementary-material-1.pdf]

## Appendix On line. 1 Month and 1 year recurrent VTE, hospitalization, major bleeding and adverse events

### Recurrent VTE

| <b>1 Month</b>              | n    | no | %    | present | %    | OR   | CI   | CI    |
|-----------------------------|------|----|------|---------|------|------|------|-------|
| RV/LV > 1                   | 1950 | 7  | 53.8 | 6       | 46.2 | 1.84 | 0.62 | 5.51  |
| RV/LVsa > 0,9               | 1914 | 5  | 38.5 | 8       | 61.5 | 1.85 | 0.60 | 5.67  |
| Septal Bowing               | 1949 | 11 | 91.7 | 1       | 8.3  | 1.07 | 0.14 | 8.32  |
| Septal flattening           | 1949 | 6  | 50.0 | 6       | 50.0 | 2.64 | 0.85 | 8.23  |
| Aorta > 40 mm               | 1840 | 11 | 91.7 | 1       | 8.3  | 4.17 | 0.53 | 33.10 |
| Pulmonary Trunk > 29 mm     | 1949 | 7  | 53.8 | 6       | 32.4 | 1.79 | 0.60 | 5.33  |
| PT/Aorta > 1.0              | 1950 | 8  | 61.5 | 5       | 38.5 | 2.38 | 0.77 | 7.31  |
| Cardiothoracic ratio > 0,50 | 1833 | 6  | 50.0 | 6       | 50.0 | 0.96 | 0.31 | 2.98  |
| Backflow IVC                | 1754 | 7  | 63.6 | 4       | 36.4 | 0.97 | 0.28 | 3.34  |
| Intrahepatic Reflux         | 1754 | 9  | 81.8 | 2       | 18.2 | 1.27 | 0.27 | 5.93  |
| Backflow azygos vein        | 1947 | 12 | 92.3 | 1       | 7.7  | 0.28 | 0.04 | 2.16  |
| <b>1 Year</b>               | n    | no | %    | present | %    | OR   | CI   | CI    |
| RV/LV > 1                   | 1950 | 33 | 66.0 | 17      | 34.0 | 1.11 | 0.61 | 2.00  |
| RV/LVsa > 0,9               | 1914 | 24 | 48.0 | 56      | 52.0 | 1.25 | 0.72 | 2.20  |
| Septal Bowing               | 1949 | 45 | 91.8 | 4       | 8.2  | 1.05 | 0.37 | 2.94  |
| Septal flattening           | 1949 | 35 | 71.4 | 14      | 28.6 | 1.05 | 0.56 | 1.97  |
| Aorta > 40 mm               | 1840 | 45 | 95.7 | 2       | 4.3  | 2.05 | 0.48 | 8.77  |
| Pulmonary Trunk > 29 mm     | 1949 | 35 | 70.0 | 15      | 30.0 | 0.89 | 0.48 | 1.64  |
| PT/Aorta > 1.0              | 1950 | 41 | 82.0 | 9       | 18.0 | 0.83 | 0.40 | 1.71  |
| Cardiothoracic ratio > 0,50 | 1833 | 25 | 51.0 | 24      | 49.0 | 0.92 | 0.52 | 1.62  |
| Backflow IVC                | 1754 | 28 | 65.1 | 15      | 34.9 | 0.91 | 0.48 | 1.72  |
| Intrahepatic Reflux         | 1754 | 34 | 79.1 | 9       | 20.9 | 1.53 | 0.73 | 3.23  |
| Backflow azygos vein        | 1947 | 42 | 84.0 | 8       | 16.0 | 0.64 | 0.30 | 1.37  |

### Hospitalisation

| <b>1 Month</b>              | n    | no | %    | present | %    | OR   | CI   | CI   |
|-----------------------------|------|----|------|---------|------|------|------|------|
| RV/LV > 1                   | 1950 | 62 | 68.9 | 28      | 31.1 | 0.97 | 0.61 | 1.52 |
| RV/LVsa > 0,9               | 1914 | 47 | 52.2 | 43      | 47.8 | 1.06 | 0.69 | 1.61 |
| Septal Bowing               | 1949 | 81 | 91.0 | 8       | 9.0  | 1.17 | 0.55 | 2.46 |
| Septal flattening           | 1949 | 65 | 73.0 | 24      | 27.0 | 0.97 | 0.60 | 1.56 |
| Aorta > 40 mm               | 1840 | 82 | 96.5 | 3       | 3.5  | 1.70 | 0.51 | 5.63 |
| Pulmonary Trunk > 29 mm     | 1949 | 54 | 60.0 | 36      | 40.0 | 1.41 | 0.91 | 2.17 |
| PT/Aorta > 1.0              | 1950 | 67 | 74.4 | 23      | 25.6 | 1.32 | 0.81 | 2.14 |
| Cardiothoracic ratio > 0,50 | 1833 | 41 | 46.1 | 48      | 53.9 | 1.13 | 0.74 | 1.73 |
| Backflow IVC                | 1754 | 48 | 61.5 | 30      | 38.5 | 1.07 | 0.67 | 1.70 |
| Intrahepatic Reflux         | 1754 | 66 | 84.6 | 12      | 15.4 | 1.04 | 0.56 | 1.96 |
| Backflow azygos vein        | 1947 | 76 | 84.4 | 14      | 15.6 | 0.61 | 0.34 | 1.09 |

| <b>1 Year</b>               | n    | no | %    | present | %    | OR   | CI   | CI   |
|-----------------------------|------|----|------|---------|------|------|------|------|
| RV/LV > 1                   | 1950 | 62 | 68.9 | 28      | 31.1 | 0.97 | 0.61 | 1.52 |
| RV/LVsa > 0,9               | 1914 | 47 | 52.2 | 43      | 47.8 | 1.06 | 0.69 | 1.61 |
| Septal Bowing               | 1949 | 81 | 91.0 | 8       | 9.0  | 1.17 | 0.55 | 2.46 |
| Septal flattening           | 1949 | 65 | 73.0 | 24      | 27.0 | 0.97 | 0.60 | 1.56 |
| Aorta > 40 mm               | 1840 | 82 | 96.5 | 3       | 3.5  | 1.70 | 0.51 | 5.63 |
| Pulmonary Trunk > 29 mm     | 1949 | 54 | 60.0 | 36      | 40.0 | 1.41 | 0.91 | 2.17 |
| PT/Aorta > 1.0              | 1950 | 67 | 74.4 | 23      | 25.6 | 1.32 | 0.81 | 2.14 |
| Cardiothoracic ratio > 0,50 | 1833 | 41 | 46.1 | 48      | 53.9 | 1.13 | 0.74 | 1.73 |
| Backflow IVC                | 1754 | 48 | 61.5 | 30      | 38.5 | 1.07 | 0.67 | 1.70 |
| Intrahepatic Reflux         | 1754 | 66 | 84.6 | 12      | 15.4 | 1.04 | 0.56 | 1.96 |
| Backflow azygos vein        | 1947 | 76 | 84.4 | 14      | 15.9 | 0.61 | 0.34 | 1.09 |

### Major bleeding

| <b>1 Month</b>              | n    | no | %     | present | %    | OR   | CI   | CI    |
|-----------------------------|------|----|-------|---------|------|------|------|-------|
| RV/LV > 1                   | 1950 | 7  | 53.8  | 6       | 46.2 | 1.84 | 0.62 | 5.51  |
| RV/LVsa > 0,9               | 1914 | 7  | 53.8  | 6       | 46.2 | 0.99 | 0.33 | 2.95  |
| Septal Bowing               | 1949 | 12 | 92.3  | 1       | 7.7  | 0.98 | 0.13 | 7.57  |
| Septal flattening           | 1949 | 9  | 69.2  | 4       | 30.8 | 1.17 | 0.36 | 3.81  |
| Aorta > 40 mm               | 1840 | 13 | 100.0 | 0       | 0.0  | 0.99 | 0.99 | 1.00  |
| Pulmonary Trunk > 29 mm     | 1949 | 6  | 46.2  | 7       | 53.8 | 2.44 | 0.82 | 7.28  |
| PT/Aorta > 1.0              | 1950 | 7  | 53.8  | 6       | 46.2 | 3.27 | 1.09 | 9.79  |
| Cardiothoracic ratio > 0,50 | 1833 | 3  | 23.1  | 10      | 76.9 | 3.22 | 0.88 | 11.73 |
| Backflow IVC                | 1754 | 7  | 53.8  | 6       | 46.2 | 1.46 | 0.49 | 4.37  |
| Intrahepatic Reflux         | 1754 | 9  | 69.2  | 4       | 30.8 | 2.57 | 0.78 | 8.40  |
| Backflow azygos vein        | 1947 | 9  | 69.2  | 4       | 30.8 | 1.51 | 0.46 | 4.91  |

| <b>1 Year</b>               | n    | no | %    | present | %    | OR   | CI   | CI    |
|-----------------------------|------|----|------|---------|------|------|------|-------|
| RV/LV > 1                   | 1950 | 18 | 60.0 | 12      | 40.0 | 1.43 | 0.69 | 3.00  |
| RV/LVsa > 0,9               | 1914 | 15 | 51.7 | 14      | 48.3 | 1.08 | 0.52 | 2.24  |
| Septal Bowing               | 1949 | 25 | 83.3 | 5       | 16.7 | 2.39 | 0.90 | 6.34  |
| Septal flattening           | 1949 | 21 | 70.0 | 9       | 30.0 | 1.13 | 0.51 | 2.47  |
| Aorta > 40 mm               | 1840 | 27 | 96.4 | 1       | 3.6  | 1.68 | 0.22 | 12.71 |
| Pulmonary Trunk > 29 mm     | 1949 | 11 | 36.7 | 19      | 63.3 | 3.66 | 1.73 | 7.74  |
| PT/Aorta > 1.0              | 1950 | 18 | 60.0 | 12      | 40.0 | 2.57 | 1.23 | 5.37  |
| Cardiothoracic ratio > 0,50 | 1833 | 10 | 34.5 | 19      | 65.5 | 1.84 | 0.85 | 3.97  |
| Backflow IVC                | 1754 | 16 | 57.1 | 12      | 42.9 | 1.28 | 0.60 | 2.73  |
| Intrahepatic Reflux         | 1754 | 23 | 82.1 | 5       | 17.9 | 1.25 | 0.47 | 3.31  |
| Backflow azygos vein        | 1947 | 24 | 80.0 | 6       | 20.0 | 0.84 | 0.34 | 2.07  |

## All Adverse Events

| <b>1 Month</b>              | n    | no  | %    | present | %    | OR   | CI   | CI   |
|-----------------------------|------|-----|------|---------|------|------|------|------|
| RV/LV > 1                   | 1950 | 92  | 69.7 | 40      | 30.3 | 0.93 | 0.63 | 1.36 |
| RV/LVsa > 0,9               | 1914 | 66  | 50.4 | 65      | 49.6 | 1.14 | 0.80 | 1.63 |
| Septal Bowing               | 1949 | 121 | 92.4 | 10      | 7.6  | 0.97 | 0.50 | 1.89 |
| Septal flattening           | 1949 | 96  | 73.3 | 35      | 26.7 | 0.95 | 0.64 | 1.42 |
| Aorta > 40 mm               | 1840 | 120 | 96.8 | 4       | 3.2  | 1.56 | 0.55 | 4.44 |
| Pulmonary Trunk > 29 mm     | 1949 | 75  | 56.8 | 57      | 43.2 | 1.63 | 1.14 | 2.34 |
| PT/Aorta > 1.0              | 1950 | 96  | 72.7 | 36      | 27.3 | 1.46 | 0.98 | 2.17 |
| Cardiothoracic ratio > 0,50 | 1833 | 58  | 45.0 | 71      | 55.0 | 1.19 | 0.83 | 1.70 |
| Backflow IVC                | 1754 | 71  | 61.2 | 45      | 38.8 | 1.09 | 0.74 | 1.60 |
| Intrahepatic Reflux         | 1754 | 94  | 81.0 | 22      | 19.0 | 1.37 | 0.84 | 2.22 |
| Backflow azygos vein        | 1947 | 110 | 83.3 | 22      | 16.7 | 0.66 | 0.41 | 1.05 |
| <b>1 Year</b>               | n    | no  | %    | present | %    | OR   | CI   | CI   |
| RV/LV > 1                   | 1950 | 92  | 69.7 | 40      | 30.3 | 0.93 | 0.63 | 1.36 |
| RV/LVsa > 0,9               | 1914 | 66  | 50.4 | 65      | 19.6 | 1.14 | 0.80 | 1.63 |
| Septal Bowing               | 1949 | 121 | 92.4 | 10      | 7.6  | 0.97 | 0.50 | 1.89 |
| Septal flattening           | 1949 | 96  | 73.3 | 35      | 26.7 | 0.95 | 0.64 | 1.42 |
| Aorta > 40 mm               | 1840 | 120 | 96.8 | 4       | 3.2  | 1.56 | 0.55 | 4.44 |
| Pulmonary Trunk > 29 mm     | 1949 | 75  | 56.8 | 57      | 43.2 | 1.63 | 1.14 | 2.34 |
| PT/Aorta > 1.0              | 1950 | 96  | 72.7 | 36      | 27.3 | 1.46 | 0.98 | 2.17 |
| Cardiothoracic ratio > 0,50 | 1833 | 58  | 45.0 | 71      | 55.0 | 1.19 | 0.83 | 1.70 |
| Backflow IVC                | 1754 | 71  | 61.2 | 45      | 38.8 | 1.09 | 0.74 | 1.60 |
| Intrahepatic Reflux         | 1754 | 94  | 81.0 | 22      | 19.0 | 1.37 | 0.84 | 2.22 |
| Backflow azygos vein        | 1947 | 110 | 83.3 | 22      | 16.7 | 0.66 | 0.41 | 1.05 |
